# Supplementary material for: Positive association of triglyceride-glucose index with new-onset hypertension among adults: a national cohort study in China
Source: PubMed Central journal article supplement (PMC10022268; doi:10.1186/s12933-023-01795-7), 2023-03-16

# The VIF values for all variables in the model

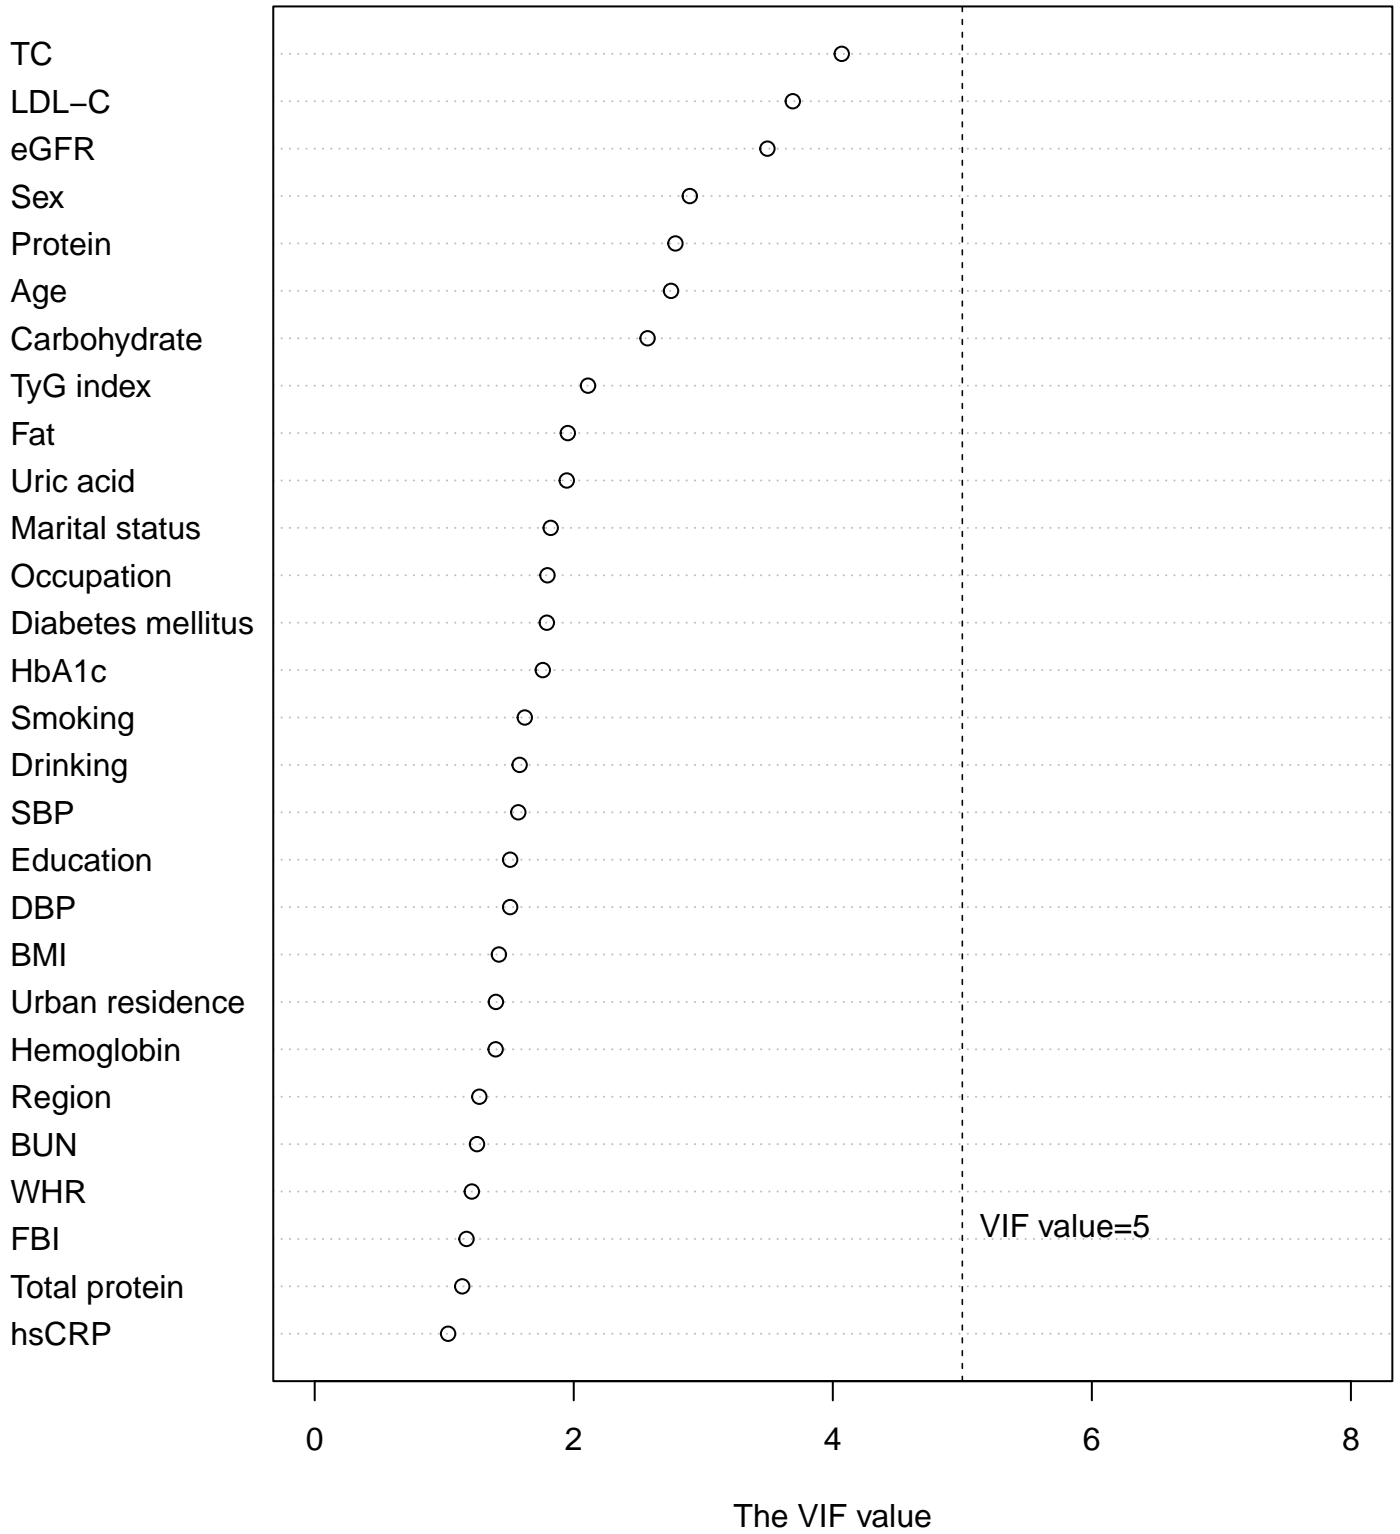

Supplement: 12933_2023_1795_MOESM1_ESM.pdf [file 12933_2023_1795_MOESM1_ESM.pdf]
