# Supplementary material for: Positive association of triglyceride-glucose index with new-onset hypertension among adults: a national cohort study in China
Source: PubMed Central journal article supplement (PMC10022268; doi:10.1186/s12933-023-01795-7), 2023-03-16

Risk ratio for confounder-outcome relationship

10

5

E value:

( 1.69, 1.69 )

5

10

Risk ratio for exposure-confounder relationship

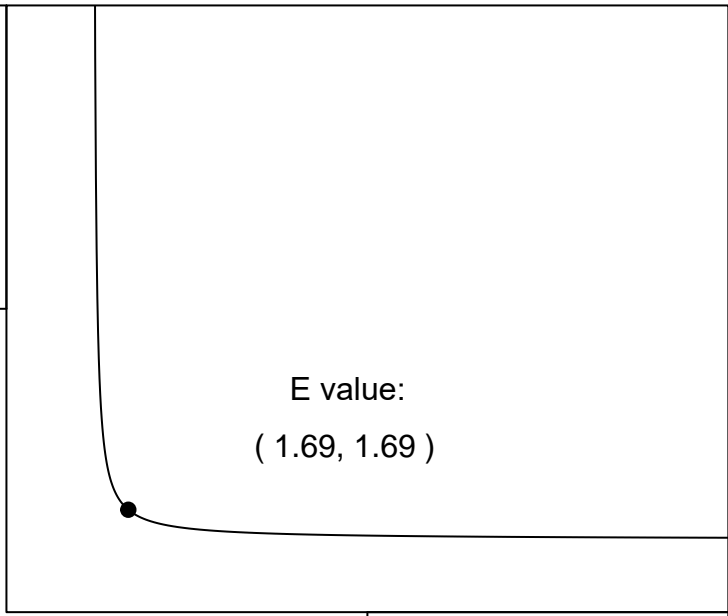

Supplement: 12933_2023_1795_MOESM3_ESM.pdf [file 12933_2023_1795_MOESM3_ESM.pdf]
